# Quantitative Analysis of Interactive Behavior of Mitochondria and Lysosomes Using Structured Illumination Microscopy

Qixin Chen<sup>a,b,c†</sup>, Xintian Shao<sup>a,b,c†</sup>, Mingang Hao<sup>b†</sup>, Zhiqi Tian<sup>b</sup>, Chenran Wang<sup>b</sup>, Fei Liu<sup>a,c</sup>, Kai Zhang<sup>d</sup>, Fengshan Wang<sup>a</sup>, Peixue Ling<sup>a,c</sup>, Jun-Lin Guan<sup>b</sup>, Jiajie Diao<sup>b</sup>

*a. School of Pharmaceutical Sciences, Shandong University, Jinan 250101, China.*

*b. Department of Cancer Biology, University of Cincinnati College of Medicine, Cincinnati, OH 45267, USA.*

*c. Shandong Academy of Pharmaceutical Science, Key Laboratory of Biopharmaceuticals, Engineering Laboratory of Polysaccharide Drugs, National–Local Joint Engineering Laboratory of Polysaccharide Drugs, Jinan 250101, China.*

*d. Department of Biochemistry, University of Illinois at Urbana-Champaign, Urbana, IL 61801, USA.*

†These authors contributed equally to this work.

Contact:

Peixue Ling, E-mail: lpxsdf@163.com, Address: 44 Wenhuxi Rd, School of Pharmaceutical Sciences, Shandong University, Jinan 250101, China.

Jun-Lin Guan, E-mail: guanjl@ucmail.uc.edu, Address: 3125 Eden Ave, Department of Cancer Biology,

20 University of Cincinnati College of Medicine, Cincinnati, OH 45267, USA.

21 Jiajie Diao, E-mail: [jiajie.diao@uc.edu](mailto:jiajie.diao@uc.edu), Address: 3125 Eden Ave, Department of Cancer Biology, University of  
22 Cincinnati College of Medicine, Cincinnati, OH 45267, USA.

23  
24 **KEYWORDS** mitochondria; lysosome; mitophagy; membrane fusion, super-resolution imaging

25  
26 **Abbreviations** CCCP: carbonyl cyanide m-chlorophenyl hydrazone; FWHM: full-width at half-maximum; LTR:  
27 Lyso-Tracker Red; MLC: mitochondria and lysosome contact; MTG: Mito-Tracker Green; SIM: structured  
28 illumination microscopy

29  
30 **ABSTRACT**

31 Super-resolution optical microscopy has extended the spatial resolution of cell biology from the cellular level to  
32 the nanoscale, enabling the observation of the interactive behavior of single mitochondria and lysosomes.  
33 Quantitative parametrization of interaction between mitochondria and lysosomes under super-resolution optical  
34 microscopy, however, is currently unavailable, which has severely limited our understanding of the molecular  
35 machinery underlying mitochondrial functionality. Here, we introduce an  $M$ -value to quantitatively investigate  
36 mitochondria and lysosome contact (MLC) and mitophagy under structured illumination microscopy. We found  
37 that the  $M$ -value for an MLC is typically less than 0.4, whereas in mitophagy it ranges from 0.5 to 1.0. This  
38 system permits further investigation of the detailed molecular mechanism governing the interactive behavior of  
39 mitochondria and lysosomes.

## 41 Introduction

42 The crosstalk between mitochondria and lysosomes is involved in many cellular processes. For instance,  
43 mitophagy, a process that selectively removes redundant or damaged mitochondria, plays an important role in  
44 regulating the number of intracellular mitochondria and maintaining mitochondrial functions.<sup>1</sup> Dysregulated  
45 mitophagy is implicated in many diseases, such as neurodegenerative diseases and cancer.<sup>2-4</sup> To date, mitophagy  
46 has been often studied at the cell level through methods such as flow cytometry,<sup>5</sup> enzyme-linked  
47 immunosorbent assay,<sup>6</sup> western-blot,<sup>7</sup> and confocal fluorescence microscopy.<sup>8-10</sup> These methods only report the  
48 cumulative level of mitophagy and ignore individual mitophagy events from the fusion between single  
49 mitochondria and lysosome pair. Although confocal fluorescence microscopy can detect mitophagy using  
50 mitophagy-specific dye, it is difficult to distinguish subcellular structures at a resolution beyond 200 nm.<sup>11, 12</sup>  
51 Moreover, confocal fluorescence microscopy does not provide details for the interactive behavior of individual  
52 mitochondria and lysosome pairs. Thus, a novel strategy is needed to capture detailed information on the  
53 crosstalk between individual mitochondria and lysosome pairs.

54  
55 Recently developed super-resolution fluorescence microscopy techniques, such as stimulated emission depletion  
56 (STED),<sup>11, 13, 14</sup> structured illumination microscopy (SIM),<sup>12, 15, 16</sup> and stochastic optical reconstruction  
57 microscopy (STORM),<sup>17-19</sup> as well as other single-molecule super-resolution imaging techniques,<sup>20, 21</sup> have  
58 provided new tools for investigating interactions between organelles at the subcellular level. And the interaction  
59 between mitochondria and lysosomes have been brought into focus using these techniques. For example, SIM  
60 super-resolution imaging has revealed a new type of interaction, mitochondria and lysosome contact (MLC).<sup>12,</sup>  
61 <sup>22</sup> Unfortunately, a parametrization system for the assessment of the interactive behaviors such as MLC and  
62 mitophagy under a super-resolution microscope is currently unavailable.

63  
64 To fill this gap, in this toolbox paper, we propose an analysis system, *M*-value, to quantitatively analyze the  
65 crosstalk between mitochondria and lysosomes at the subcellular level. The *M*-value in MLC is less than 0.4,  
66 whereas the *M*-value in mitophagy ranges from 0.5 to 1.0. Thus, this *M*-value system provides a robust platform  
67 to quantitatively analyze the interactive behavior of subcellular organelles under super-resolution microscopy.

## 68 **Results**

### 69 *MLC in living HeLa cells under SIM*

70 To investigate MLC events in living HeLa cells using super-resolution imaging, we first incubated cells with a  
71 commercially available mitochondrial probe (Mito-Tracker Green, MTG, 100 nM) and a lysosomal probe  
72 (Lyso-Tracker Red, LTR, 200 nM) for 30 min, and then observed mitochondria (green) and lysosomes (red)  
73 under a SIM (Fig. 1A). The intracellular mitochondria showed spherical, rod-shaped or filamentous  
74 arrangement in an irregular manner at a resolution of approximately  $150 \pm 24.67$  nm ( $n=10$ ) (Fig. S1).  
75 Mitochondria are approximately  $0.3$   $\mu\text{m}$  in width and  $0.6$ - $10.0$   $\mu\text{m}$  in length (Fig. S2), which is consistent with  
76 our previous results.<sup>12</sup> In particular, there were more filamentous mitochondria than spherical and rod-shaped  
77 ones, a benchmark of healthy cells. In contrast, the diameter of spherical lysosomes (red color) was  $0.6 \pm 0.16$   
78  $\mu\text{m}$  ( $n=200$ ) (Fig. S3). Both MTG and LTR allow for high-resolution staining under SIM, which enabled us to  
79 capture and understand the dynamic process of MLC (Fig. 1A, B). MLC events occur frequently in living cells  
80 (Fig. 1B) with a dynamic process from contact to separation (Fig. 1B, white arrows). In addition, we observed  
81 that mitochondria were surrounded by multiple lysosomes (Fig. 1C). Various types of MLC events,<sup>12, 22</sup> such as  
82 point contact (Fig. 1E-7), extended contact (Fig. 1E-8), and surrounding contact (Fig. 1E-9) were also observed.

### 84 *Quantitative analysis of whole-cell MLC*

85 Recently, it has been reported that dysregulated contact sites formed by mitochondria and lysosomes are linked  
86 to Parkinson's disease.<sup>23</sup> We reason that proteins involved in MLC will provide a new perspective and drug  
87 targets for the treatment of this disease. A quantitative analysis platform to analyze MLC at the subcellular level  
88 would therefore allow us to understand the biological functions and evaluate the therapeutic effects of different  
89 drugs. Here, we introduce a quantitative analysis system, *M*-value that is derived from the full-width at  
90 half-maximum (FWHM) of organelle images, for understanding MLC events at the subcellular level. FWHM  
91 refers to the full width of the image at half-maximum value and can directly reflect the resolution of image.  
92 MTG-stained Mitochondria and LTR-stained lysosomes result in yellow spots when they merge (Fig. 1H).  
93 Herein, we use the following calculation formula to define the *M*-value of the merge.

$$M = \frac{2Y}{R_{\text{FWHM}} + G_{\text{FWHM}}}$$

$R_{\text{FWHM}}$  indicates the FWHM of red (lysosome);  $G_{\text{FWHM}}$  indicates the FWHM of green (mitochondria);  $Y$  indicates the merging distance between  $R_{\text{FWHM}}$  and  $G_{\text{FWHM}}$ .

We will demonstrate that the  $M$ -value is a simple and well-defined number that can be used to quantitatively assess MLC events in live cells. We first observed that a typical MLC event (Fig. 1B, D) generates an ensemble of  $M$ -values below 0.4. We hypothesize that an  $M$ -value 0.4 can be the upper bound to characterize dynamic MLC events. To support this idea, we calculated the  $M$ -values of a large number of MLC events ( $n=100$ ) (Fig. 1C, E, F, G and Fig. S4-8) and found that the  $M$ -values of all MLC events were indeed below 0.4 (Fig. 1J).

### ***Quantitative analysis of whole-cell mitophagy***

Mitophagy has been commonly studied by co-localizing fluorescently stained mitochondria and autophagosomes with confocal microscopy in cells.<sup>24</sup> However, this strategy is not suitable for the quantitative analysis of mitochondria-lysosome interactions at the subcellular level. To address this issue, we set out to use the  $M$ -value to quantitatively analyze mitophagy.

Mitophagy was triggered by the incubation of HeLa cells with 10.0  $\mu\text{M}$  carbonyl cyanide *m*-chlorophenyl hydrazone (CCCP), a common mitochondria damage inducer, for 12 h.<sup>12, 24, 25</sup> Cells were then stained with MTG and LTR and observed under SIM (Fig. 2A). Treatment with CCCP broke mitochondria into spherical shapes with varying sizes compared to untreated cells, which primarily showed filamentous mitochondria (Fig. 1A). In addition, CCCP treatment induced more frequent mitophagy (Frame 1-3 in Fig. 2A), as evidenced by the appearance of more yellow spots resulting from fusion between mitochondria (green) and lysosomes (red) (Fig. 2A inset 1-3 and Fig. 2B). This result indicates that more mitophagy occurs under pathological conditions. Because dysfunctional mitophagy is closely associated with many diseases,<sup>2-4</sup> a quantitative analysis of mitophagy is of great significance for the drug development.

119

120 With this goal in mind, we calculated the  $M$ -value of the mitophagy after the cell was exposed to CCCP for 12 h  
121 (Fig. 2A blue enlargement, and Fig. 2D). The  $M$ -value of the mitophagy event is greater than 0.5, and some  
122 even reaches close to 1.0 (Fig. 2C, E). To test whether the  $M$ -value can be applied to all mitophagy events, we  
123 performed a quantitative analysis to more mitophagy events ( $n=100$ ) (Fig. S9-12). The  $M$ -values in all  
124 mitophagy events consistently range from 0.5 to 1.0 (Figure 3A). Thus, the  $M$ -value platform provides a robust  
125 system to differentiate MLC (0-0.4) and mitophagy (0.5-1.0) in physiological and pathological conditions.

126

127 To verify the applicability of using the  $M$ -value for MLC and mitophagy, we next applied the  $M$ -value to  
128 quantitative analysis of an MLC (Fig. 3B, C) and a mitophagy event (Fig. 3D, E) at different rotation angles  
129 ( $0^\circ$ - $180^\circ$ ). We found that the  $M$ -value for MLC and mitophagy is consistent at different observation angles.  
130 Finally, CCCP-induced mitophagy was confirmed with a commercially available mitophagy detection dye,<sup>24</sup>  
131 which generates higher red fluorescence compared with untreated cells (Fig. 3F).

132

### 133 *Comparison of interactive behavior of mitochondrial and lysosome using epi-illumination fluorescence* 134 *microscopy, confocal microscopy, and SIM*

135 To demonstrate the advantages of SIM, we compared the performance of epi-illumination fluorescent  
136 microscopy, confocal microscopy, and SIM in resolving mitochondria-lysosome interaction using the same  
137 staining process with MTG and LTR (Fig. 4). Mitochondria and lysosomes appeared as green and red plaques in  
138 untreated cells under an epi-illumination fluorescence microscope, and a large area of yellow plaque was  
139 generated in the overlaid image (Fig. 4A). One cannot capture any information about MLC events at this spatial  
140 resolution, which may even cause a misinterpretation of mitophagy in untreated cells. Figure 4B showed the  
141 morphology of mitochondria and lysosomes under a confocal microscope. Although confocal microscopy  
142 successfully located mitochondria and lysosomes at the subcellular level, its spatial resolution ( $\sim 500$  nm, Fig.  
143 S13) is not enough for the quantitative investigation of the detailed mitochondria-lysosome interaction below  
144 100 nm, compared with SIM (Fig. 4C).

145

146 In order to further investigate the mitochondria-lysosome interaction under pathological conditions using  
147 different optical microscopy techniques, we incubated 10.0  $\mu$ M CCCP with HeLa cells for 12 h before staining  
148 with MTG and LTR. As expected, neither epi-illumination fluorescence microscopy (Fig. 4D) nor confocal  
149 microscopy (Fig. 4E) was able to clearly capture mitophagy at the subcellular level. In contrast, SIM provides  
150 excellent imaging quality that can resolve the mitochondria-lysosome interaction (Fig. 4F).

151

### 152 *Application of M-value to ATG13 and FIP200 knockout cell*

153 Since the *M*-value system is feasible to quantitatively separate MLC (<0.4) and mitophagy (0.5-1.0), we then  
154 applied *M*-value to analyze the crosstalk of mitochondria and lysosomes in ATG13 knockout (ATG13 KO) and  
155 FIP200 knockout (FIP200 KO) HeLa cells. Both ATG13 and FIP200 play important roles in the process of  
156 autophagy and mitophagy (Fig 5A).<sup>26, 27 28, 29</sup> The endogenous ATG13 and FIP200 in wild-type (WT) cells were  
157 knocked out with a CRISPR/Cas9 gene editing assay (Fig 5B). The ATG13 KO and FIP200 KO cells were then  
158 exposed to media with or without 10.0  $\mu$ M CCCP for 12 h prior to staining with MTG and LTR. In untreated  
159 ATG13 KO cells (Fig 5C), mitochondria showed a continuous rod shape, and interacted with lysosomes as  
160 MLC (*M*-value, 0.245) (Fig 5E-1). After CCCP treatment, damaged mitochondria appeared as granules with  
161 various sizes (Fig 5C), which is similar to those in CCCP-treated WT cells (Fig 2A). MLC (*M*-value, 0.186)  
162 also occurred under CCCP treatment (Fig 5E-2). In contrast, compared to CCCP-treated WT cells (Fig 2A),  
163 mitophagy events in CCCP-treated ATG13 KO cells significantly decreased. In FIP200 KO cells, no mitophagy  
164 was observed before and after CCCP-treatment (Fig 5D, E-3, E-4), whereas MLC still occurred. These results  
165 demonstrated that ATG13 and FIP200 are required for mitophagy. The *M*-value system is applicable to  
166 distinguish the two events in autophagy-defective cells.

167

### 168 **Discussion**

169 Mitochondria are important organelles for energy conversion in eukaryotic cells and are involved in a variety of  
170 biological processes such as intracellular homeostasis, proliferation, senescence, and death.<sup>30, 31</sup> At the same  
171 time, functions of mitochondria are regulated by their interactions with lysosomes through processes such as  
172 MLC and mitophagy.<sup>12, 22, 32, 33</sup> MLC is widely found in cells, and it was recently discovered that RAB7 GTP

173 hydrolysis plays a key role in the MLC process.<sup>22</sup> Mitophagy is an autophagy process that selectively removes  
174 redundant or damaged mitochondria, which regulates the number of mitochondria in cells and maintains normal  
175 mitochondrial function.<sup>2, 4, 34</sup> Herein, the interactive behaviors of individual mitochondria and lysosome pairs  
176 were observed under SIM. Compared to conventional tools such as epi-illumination and confocal fluorescence  
177 microscopy, SIM offers an improved spatial resolution to capture detailed information of the dynamic  
178 mitochondria-lysosome interactions in live cells.

180 Another bottleneck that limits our understanding of mitochondria-lysosome interaction is a lack of quantitative  
181 analysis platform for data generated from SIM. To address this challenge, we developed an *M*-value platform  
182 based on the FWHM of organelle images. This platform allows us to successfully differentiate MLC from  
183 mitophagy because their *M*-values are bounded within different range: an *M*-value below 0.4 implies MLC and  
184 an *M*-value ranging from 0.5 to 1.0 implies mitophagy. Thus, the *M*-value quantitative analysis system based on  
185 the super-resolution microscopy technique opens a new avenue to adopt automatic image analyzing software for  
186 high-throughput study of subcellular organelle interactions.

188 We envision that the *M*-value platform will specifically benefit high-throughput drug screening as an evaluation  
189 index of pharmacodynamics. Currently, high-throughput drug screening mainly relies on reporter gene systems,  
190 fluorescent labeling detection, micro-chemical technology, and fluorescence imaging technology.<sup>35</sup> Among  
191 them, the combination of fluorescence imaging and automatic analysis is an excellent screening strategy for  
192 micro-, sub-cellular image analysis in living cells.<sup>36</sup> However, the confocal microscopy systems commonly  
193 used in these high-throughput screening systems cannot provide sufficient spatial resolution to capture organelle  
194 interactions in live cells.<sup>37, 38</sup> Combining artificial intelligence and SIM imaging with *M*-value system will  
195 significantly retrench the process of early drug discovery and shorten the drug screening cycle to promote the  
196 success rate of novel drug discovery.

## 198 **Materials and methods**

### 199 *Materials*



Mito-Tracker Green (#M7514, MTG) and Lyso-Tracker Red (#L12492, LTR) were obtained from Invitrogen (Eugene, Oregon, USA). Mitophagy dye was obtained from Dojindo Laboratories (#MD01-10, Kumamoto, Japan), Carbonyl cyanide 3-chlorophenylhydrazone (#045200, CCCP) was obtained from Thermo Fisherscientific (Grand Island, NY, USA). Penicillin-streptomycin (#15140163, 10,000 units/ml), Fetal bovine serum (#26140079, FBS), Dulbecco's modified Eagle's medium (#11965118, DMEM) and other cell culture reagents were obtained from Gibco BRL (Grand Island, NY, USA). Primary and secondary antibodies used in this study were GAPDH (#5174, Cell Signaling Technology, Beverly, MA, USA), FIP200 (#12436, Cell Signaling Technology, Beverly, MA, USA) and ATG13 (#13273, Cell Signaling Technology, Beverly, MA, USA) and HRP-linked anti-rabbit IgG (#7074, Cell Signaling Technology, Beverly, MA, USA). HeLa cells were a generous gift from Dr. Carolyn M. Price lab (University of Cincinnati).

### ***Cell culture***

Cells were cultured in DMEM supplemented with 10% FBS, penicillin-streptomycin (100 units/ml) in a 5% CO<sub>2</sub> humidified incubator at 37 °C.

### ***Live cell labeling***

Cells were incubated with 100 nM MTG for 30 min and further co-incubated with 200 nM LTR at 37 °C for another 30 min in free DMEM, and washed with free DMEM 3 times and observed using a fluorescence microscopy, confocal laser scanning microscopy or OMX 3D-SIM super-resolution microscope.

### ***Confocal laser scanning microscopy***

The images were obtained using a LSM-710 confocal laser scanning microscope (Carl Zeiss, Inc.) equipped with a 63×/1.49 numerical aperture oil-immersion objective. I 1. and were analyzed with ZEN 2012 (Carl Zeiss, Inc.) and ImageJ software (National Institutes of Health). All fluorescence images were analyzed with ImageJ software (<https://imagej.nih.gov/ij/>).

226 ***OMX 3D-SIM super-resolution microscope imaging and analysis***

227 A total of  $2 \times 10^5$  cells were seeded on a glass bottom microwell dish and incubated with 2 ml of DMEM  
228 medium supplemented with 10% FBS for 24 h, followed by CCCP or vehicle treatment for 12h. After treatment,  
229 the cells were washed 3 times with pre-warmed free DMEM medium, stained with 100 nM MTG for 30 min,  
230 co-incubated with 200 nM LTR at 37 °C for another 30 min, and washed with free DMEM for 3 times. Finally,  
231 cells were cultured in phenol-free medium (#1894117, Gibco, Grand Island, NY, USA) and observed under an  
232 OMX 3D-SIM super-resolution microscope (Bioptechs, Inc) that is equipped with an Olympus 100 $\times$ /1.49  
233 numerical aperture oil-immersion objective lens and solid-state lasers.

234

235 Firstly, the lasers (488 nm and 561 nm) were turned on and waited for 20 min to make the instrument thermally  
236 stable. After cleaning the lens, an immersion oil droplet (refractive index 1.516) was placed on the lens. Finally,  
237 the sample was placed on a tray for imaging. In order to reduce photobleaching, a 10 ms exposure time and 1%  
238 transmission excitation power was used to focus the sample and find the cells. Images were captured with an  
239 electron-multiplying charge coupled device (EMCCD) camera (Photometrics Cascade II) with a gain value of  
240 3000 at 10 MHz. The exposure time was set to 50 ms per frame. Whole-frame images (512 $\times$ 512 pixels) were  
241 acquired using Z-stacks with a step size of 0.2  $\mu$ m.

242

243 SIM images were analyzed with ImageJ software equipped a fluorescence intensity measurement tool. The  
244 intensity profile along the perpendicular (white solid lines, Fig. S14) of mitochondria-lysosome contact (white  
245 dash lines, Fig. S14) was used for the *M*-value calculation.

246

247 ***CRISPR/Cas9-mediated knockout of FIP200 and ATG13 in HeLa cells***

248 The pX458 plasmid (pSpCas9(BB)-2A-GFP; Addgene) was used as the cloning backbone for expressing  
249 sgFIP200 and sgATG13. Two complementary oligos for each sgRNA were denatured, annealed and ligated into  
250 linearized pX458 vector digested by BbsI (New England Biolabs). Empty constructs and pooled pX458-sgRNA  
251 were transiently transfected into HeLa cells respectively using Lipofectamine 3000 (Invitrogen). After 48 hr, the  
252 transfected cells were sorted based on the fluorescence of GFP (reporter) using a FACSAria cytometer (BD

253 Biosciences). Sorted individual cells were cultured in a 96-well plate and were subjected to Western blot  
254 analyses. At least three different clones were pooled for functional experiments. The sgRNA sequences targeting  
255 FIP200 and ATG13 were based on the published literature using CRISPR/Cas9 library.<sup>39, 40</sup> sgRNA sequences of  
256 FIP200 and ATG13 are listed below:

257 sgFIP200: CAGGTGCTGGTGGTCAATGG

258 sgATG13-1: TCACCCTAGTTATAGCAAGA

259 sgATG13-2: CAGTCTGTTGTACACCGTGT

260 sgATG13-3: GACTGTCCAAGTGATTGTCC

261

### 262 ***Western-blot assay***

263 Cells were cultured in 3.5 cm diameter plates (80-90% confluence), washed by PBS buffer, and lysed for 15  
264 min on ice using RIPA buffer (#C2978, Sigma, St. Louis, MO, USA) containing an anti-protease mix (#PI78415,  
265 Thermo Scientific, Waltham, MA, USA). Protein concentration was measured by BCA assay (#23225, Thermo  
266 Scientific, Waltham, MA, USA). Equal amounts of proteins were subjected to SDS-PAGE and immunoblotting  
267 as described previously.<sup>41</sup>

268

### 269 **Competing financial interests**

270 The authors declare no competing financial interests.

271

### 272 **Acknowledgements**

273 This research was supported by 973 Program (No. 2015CB856304), National Institutes of Health (NIH,  
274 R35GM128837 to J.D.; R01NS094144 and R01CA211066 to J.G.; R01NS103981 to C.W.), Natural Science  
275 Foundation of Shandong Province (ZR2017PH072, ZR2017BH051, ZR2015QL007), and Key Research and  
276 Development Plan of Shandong Province (2018GSF121033). The Light Microscopy Imaging Center (LMIC) is  
277 supported in part with funds from Indiana University Office of the Vice Provost for Research. The OMX

278 3D-SIM microscope was provided by NIH grant S10 RR028697.

279

## 280 **Author contributions**

281 Q.C., X.S. and Z.T. collected all OMX 3D-SIM super-resolution microscope data. Q.C. and X.S. analyzed and  
282 processed the OMX 3D-SIM data. Q.C. cultured cell. M.H performed confocal laser scanning microscopy. K.Z.,  
283 F.W., P.L., J.G., and J.D. conceived the project, designed the experiments, and wrote the manuscript with the  
284 help of all authors.

285

## 286 **References**

- 287 1. Youle RJ, Narendra DP. Mechanisms of mitophagy. *Nature reviews Molecular cell biology* 2011; 12:9-14.
- 288 2. Wager K, Russell C. Mitophagy and neurodegeneration. *Autophagy* 2013; 9:1693-709.
- 289 3. Nixon RA, Yang DS, Lee JH. Neurodegenerative lysosomal disorders: a continuum from development to  
290 late age. *Autophagy* 2008; 4:590-9.
- 291 4. Lee J, Liu K, Stiles B, Ou J-hJ. Mitophagy and Hepatic Cancer Stem Cells. *Autophagy* 2018:1-6.
- 292 5. Mauroliccano M, Estebanmart ínez L, Seco E, Serranopuebla A, Garcialedo L, Figueiredopereira C, et al.  
293 New method to assess mitophagy flux by flow cytometry. *Autophagy* 2015; 11:833-43.
- 294 6. Oh SH, Choi YB, Kim JH, Wehl CC, Ju JS. Quantification of autophagy flux using LC3 ELISA. *Analytical*  
295 *Biochemistry* 2017; 530:57-67.
- 296 7. Oh SH, Choi YB, Kim JH, Wehl CC, Ju JS. Comparisons of ELISA and Western blot assays for detection  
297 of autophagy flux. *Data in Brief* 2017; 13:696-9.
- 298 8. Sun N, Yun J, Liu J, Malide D, Liu C, Rovira II, et al. Measuring in vivo mitophagy. *Molecular cell* 2015;  
299 60:685-96.
- 300 9. Rodriguez-Enriquez S, Kai Y, Maldonado E, Currin RT, Lemasters JJ. Roles of mitophagy and the  
301 mitochondrial permeability transition in remodeling of cultured rat hepatocytes. *Autophagy* 2009; 5:1099-106.

- 302 10. Rodriguez-Enriquez S, Kim I, Currin RT, Lemasters JJ. Tracker dyes to probe mitochondrial autophagy  
303 (mitophagy) in rat hepatocytes. *Autophagy* 2006; 2:39-46.
- 304 11. Huang B, Babcock H, Zhuang X. Breaking the diffraction barrier: super-resolution imaging of cells. *Cell*  
305 2010; 143:1047-58.
- 306 12. Chen Q, Jin C, Shao X, Guan R, Tian Z, Wang C, et al. Super-resolution tracking of mitochondrial  
307 dynamics with an Iridium(III) luminophore. *Small* 2018; 14:1802166.
- 308 13. Kukat C, Wurm CA, Spähr H, Falkenberg M, Larsson N-G, Jakobs S. Super-resolution microscopy reveals  
309 that mammalian mitochondrial nucleoids have a uniform size and frequently contain a single copy of mtDNA.  
310 *Proceedings of the National Academy of Sciences* 2011; 108:13534-9.
- 311 14. Richardson DS, Gregor C, Winter FR, Urban NT, Sahl SJ, Willig KI, et al. SRpHi ratiometric pH  
312 biosensors for super-resolution microscopy. *Nature communications* 2017; 8:577.
- 313 15. Huang X, Fan J, Li L, Liu H, Wu R, Wu Y, et al. Fast, long-term, super-resolution imaging with Hessian  
314 structured illumination microscopy. *Nature biotechnology* 2018; 36:451-59.
- 315 16. Demmerle J, Innocent C, North AJ, Ball G, Müller M, Miron E, et al. Strategic and practical guidelines for  
316 successful structured illumination microscopy. *Nature Protocols* 2017; 12:988-1010.
- 317 17. Huang B, Wang W, Bates M, Zhuang X. Three-dimensional super-resolution imaging by stochastic optical  
318 reconstruction microscopy. *Science* 2008; 319:810-3.
- 319 18. Rust MJ, Bates M, Zhuang X. Sub-diffraction-limit imaging by stochastic optical reconstruction  
320 microscopy (STORM). *Nature methods* 2006; 3:793.
- 321 19. Van De Linde S, Löschberger A, Klein T, Heidbreder M, Wolter S, Heilemann M, et al. Direct stochastic  
322 optical reconstruction microscopy with standard fluorescent probes. *Nature protocols* 2011; 6:991.
- 323 20. Ha T, Tinnefeld P. Photophysics of fluorescent probes for single-molecule biophysics and super-resolution  
324 imaging. *Annual review of physical chemistry* 2012; 63:595-617.
- 325 21. Fernández-Suárez M, Ting AY. Fluorescent probes for super-resolution imaging in living cells. *Nature*  
326 *reviews Molecular cell biology* 2008; 9:929.

- 327 22. Wong YC, Ysselstein D, Krainc D. Mitochondria–lysosome contacts regulate mitochondrial fission via  
328 RAB7 GTP hydrolysis. *Nature* 2018; 554:382.
- 329 23. Burbulla LF, Song P, Mazzulli JR, Zampese E, Wong YC, Jeon S, et al. Dopamine oxidation mediates  
330 mitochondrial and lysosomal dysfunction in Parkinson’s disease. *Science* 2017; 357:1255-61.
- 331 24. Iwashita H, Torii S, Nagahora N, Ishiyama M, Shioji K, Sasamoto K, et al. Live Cell Imaging of  
332 Mitochondrial Autophagy with a Novel Fluorescent Small Molecule. *ACS chemical biology* 2017; 12:2546-51.
- 333 25. Geisler S, Holmström KM, Treis A, Skujat D, Weber SS, Fiesel FC, et al. The PINK1/Parkin-mediated  
334 mitophagy is compromised by PD-associated mutations. *Autophagy* 2010; 6:871-8.
- 335 26. Popelka H, Klionsky DJ. The molecular mechanism of Atg13 function in autophagy induction: What is  
336 hidden behind the data? *Autophagy* 2017; 13:449.
- 337 27. Wallot-Hieke N, Verma N, Schlütermann D, Berleth N, Deitersen J, Böhler P, et al. Systematic analysis of  
338 ATG13 domain requirements for autophagy induction. *Autophagy* 2018; 14:743-63.
- 339 28. Li F, Vierstra RD. Arabidopsis ATG11, a scaffold that links the ATG1-ATG13 kinase complex to general  
340 autophagy and selective mitophagy. *Autophagy* 2014; 10:1466-7.
- 341 29. Egan DF, Shackelford DB, Mihaylova MM, Gelino S, Kohnz RA, Mair W, et al. Phosphorylation of ULK1  
342 (hATG1) by AMP-activated protein kinase connects energy sensing to mitophagy. *Science* 2011; 331:456-61.
- 343 30. Westermann B. Mitochondrial fusion and fission in cell life and death. *Nature reviews Molecular cell  
344 biology* 2010; 11:872.
- 345 31. Chan DC. Mitochondrial Fusion and Fission in Mammals. *Annual Review of Cell and Developmental  
346 Biology* 2006; 22:79-99.
- 347 32. Balaban RS, Nemoto S, Finkel T. Mitochondria, oxidants, and aging. *Cell* 2005; 120:483-95.
- 348 33. Ding WX, Ni HM, Li M, Liao Y, Chen X, Stolz DB, et al. Nix is critical to two distinct phases of  
349 mitophagy, reactive oxygen species-mediated autophagy induction and Parkin-ubiquitin-p62-mediated  
350 mitochondrial priming. *Journal of Biological Chemistry* 2010; 285:27879-90.

- 351 34. Narendra D, Kane LA, Hauser DN, Fearnley IM, Youle RJ. p62/SQSTM1 is required for Parkin-induced  
352 mitochondrial clustering but not mitophagy; VDAC1 is dispensable for both. *Autophagy* 2010; 6:1090-106.
- 353 35. Bleicher KH, Böhm H-J, Müller K, Alanine AI. Hit and lead generation: beyond high-throughput screening.  
354 *Nature Reviews Drug Discovery* 2003; 2:369.
- 355 36. Zemanová L, Schenk A, Valler MJ, Nienhaus GU, Heilker R. Confocal optics microscopy for biochemical  
356 and cellular high-throughput screening. *Drug discovery today* 2003; 8:1085-93.
- 357 37. Starkuviene V, Pepperkok R. The potential of high - content high - throughput microscopy in drug  
358 discovery. *British journal of pharmacology* 2007; 152:62-71.
- 359 38. Boutros M, Heigwer F, Laufer C. Microscopy-based high-content screening. *Cell* 2015; 163:1314-25.
- 360 39. Sanjana NE, Shalem O, Zhang F. Improved vectors and genome-wide libraries for CRISPR screening.  
361 *Nature methods* 2014; 11:783.
- 362 40. Wang T, Wei JJ, Sabatini DM, Lander ES. Genetic screens in human cells using the CRISPR-Cas9 system.  
363 *Science* 2014; 343:80-4.
- 364 41. Chen S, Wang C, Yeo S, Liang C-C, Okamoto T, Sun S, et al. Distinct roles of autophagy-dependent  
365 and-independent functions of FIP200 revealed by generation and analysis of a mutant knock-in mouse model.  
366 *Genes & development* 2016; 30:1-14.
- 367

368 **Figure legends**

369 **Figure 1.** Whole cell quantitative analysis of mitochondrial-lysosome contact (MLC) in living cells. (A) SIM  
370 image of mitochondria (Green) and lysosomes (Red). 1-11 represent MLC events. (B) A representative dynamic  
371 process of MLC in a living HeLa cell. White solid lines indicate the fluorescence intensity shown in (D). (C)  
372 Partial enlargement of (A). White solid lines indicate the fluorescence intensity shown in (G). (E) and (H)  
373 Representative MLC events. White solid lines indicate the fluorescence intensity shown in (F). (I) Schematic  
374 diagram of calculation formula for the *M*-value of MLC. (J) *M*-value range of MLC dynamic events. Scale bars:  
375 A 5.0  $\mu\text{m}$ , B, C, E, and H 0.5  $\mu\text{m}$ , insets of A 0.5  $\mu\text{m}$ .

376

377 **Figure 2.** Quantitative analysis of fusion between mitochondria and lysosome in CCCP-treated cells. (A) Frame  
378 1-3 of mitochondrial and lysosome fusion events. White solid lines indicate fluorescence intensity shown in (C).  
379 (B) 3D-SIM surface plot of representative fusion between mitochondria and lysosome. (D) Representative  
380 fusion events in (A). White solid lines indicate fluorescence intensity shown in (E). Scale bars: A 5.0  $\mu\text{m}$ , B and  
381 D 0.5  $\mu\text{m}$ , inset of A 0.5  $\mu\text{m}$ .

382

383 **Figure 3.** *M*-value of WT cells with and without CCCP treatment. (A) *M*-value distribution of 100 MLC events  
384 in normal cells and 100 mitophagy fusions in CCCP-treated cells. (B) A MLC event at different angles. The  
385 solid white line indicates the fluorescence intensity shown in (C). (D) A mitophagy at different angles. The  
386 white solid line indicates the fluorescence intensity shown in (E). (F) Cells incubated with mitophagy dye with  
387 or without CCCP treatment. Scale bars: B 0.5  $\mu\text{m}$ , F 5.0  $\mu\text{m}$ .

388

389 **Figure 4.** Comparison of interactive behavior of mitochondrial and lysosome using fluorescence microscopy,  
390 confocal microscopy and SIM. Mitochondrial and lysosome were stained with MTG and LTR. Images of  
391 untreated cells under fluorescence microscopy (A), confocal microscopy (B), and SIM (C). Images of  
392 CCCP-treated cells under fluorescence microscopy (D), confocal microscopy (E), and SIM (F). Scale bars: 1.0  
393  $\mu\text{m}$ .



394

395 **Figure 5.** ATG13/FIP200 knockout cells under SIM. **(A)** Illustration of the role of ATG13 and FIP200 in  
396 mitophagy. **(B)** Western blot for detecting the protein expression of ATG13 and FIP200. Images of untreated  
397 and CCCP-treated ATG13 KO cells **(C)** and FIP200 KO cells **(D)**. **(E)** Representative *M*-value calculations  
398 indicate MLC events in ATG13KO cells **(1,2)** and FIP200 KO cells **(3,4)** with or without CCCP treatment.  
399 Scale bars: **C** 5.0  $\mu\text{m}$ , **E** 0.5  $\mu\text{m}$ .

400

401 **Fig. 1**

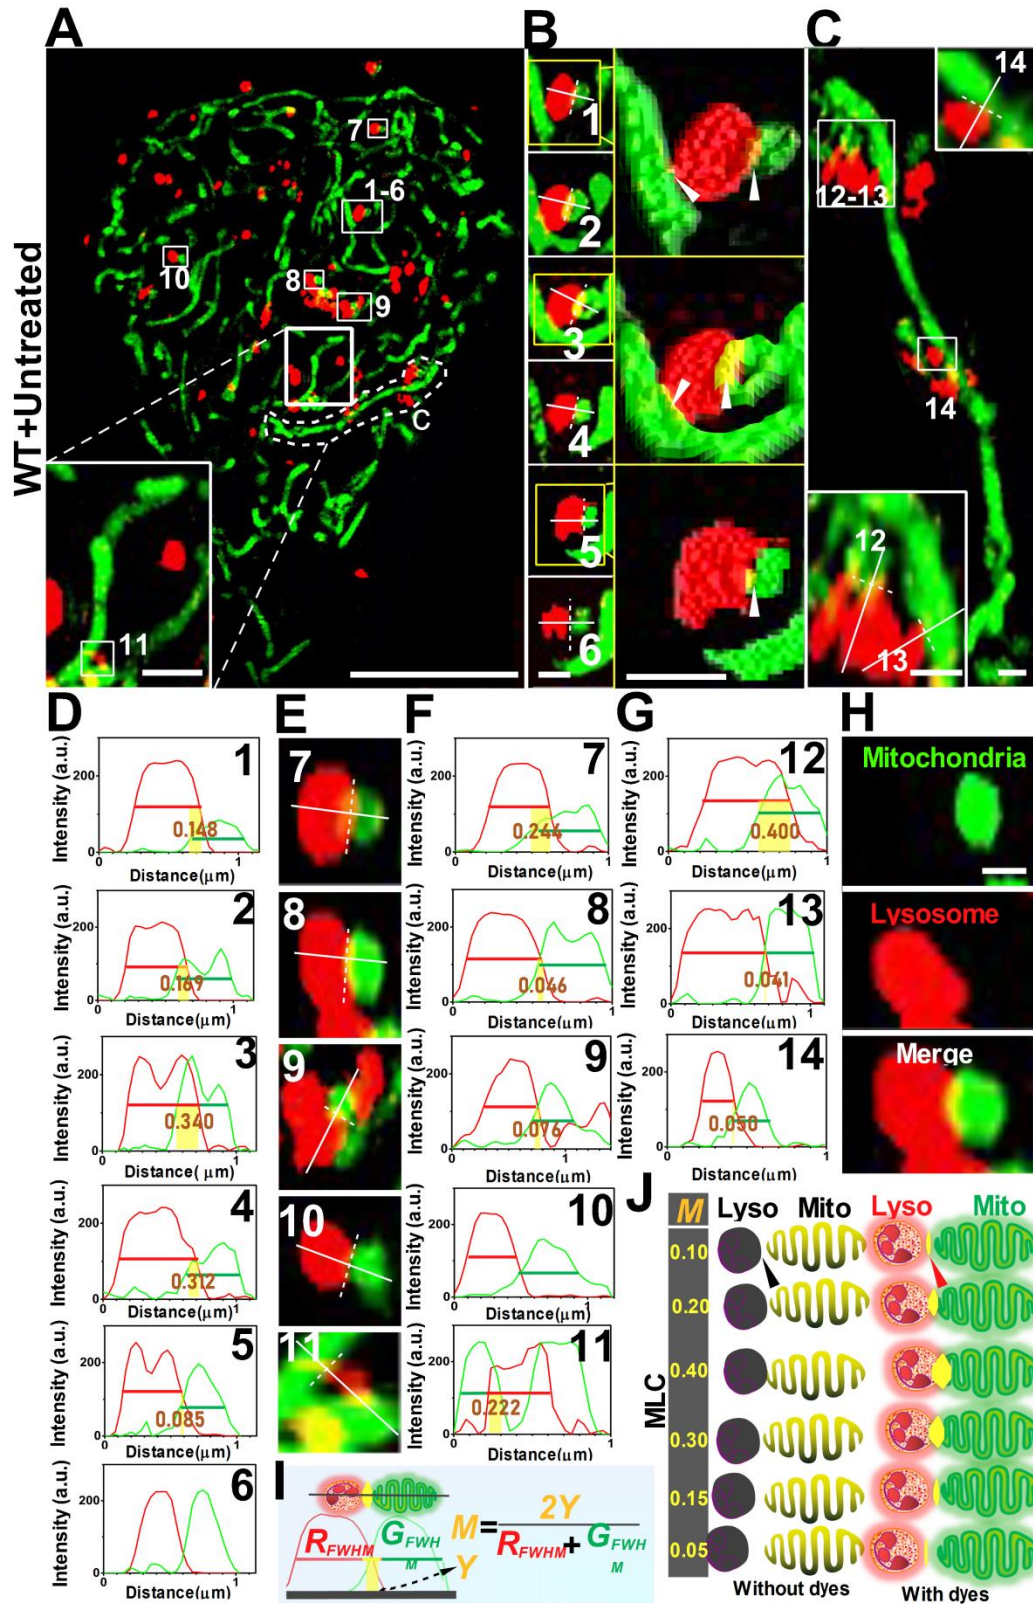

402

403

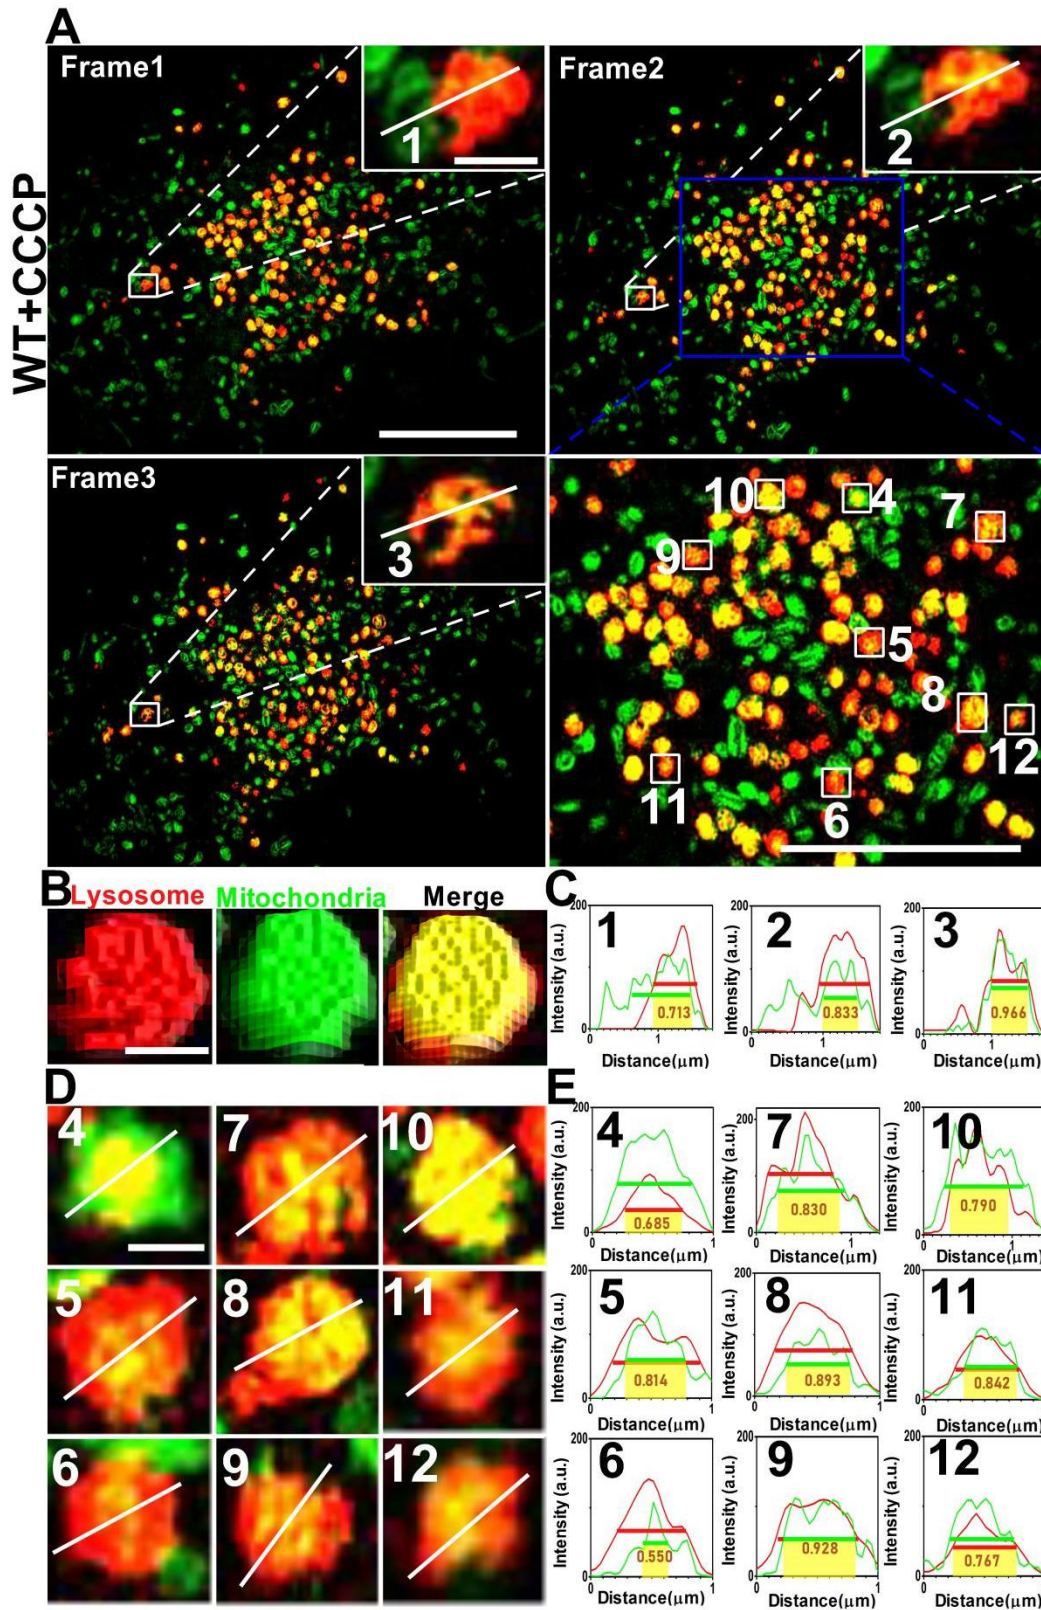



406 **Fig. 3**

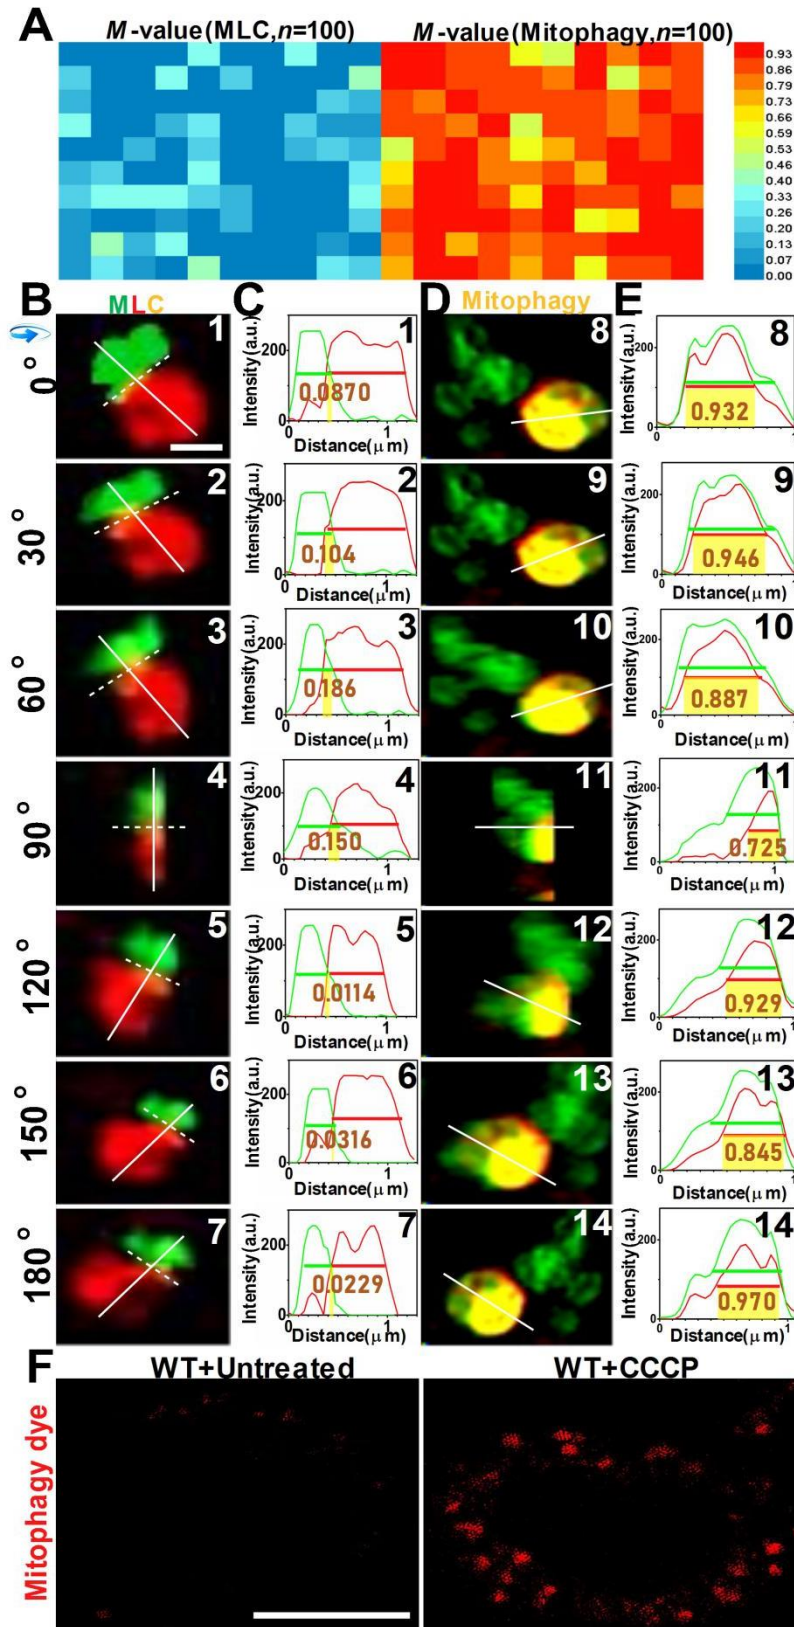

407

408

409 **Fig. 4**

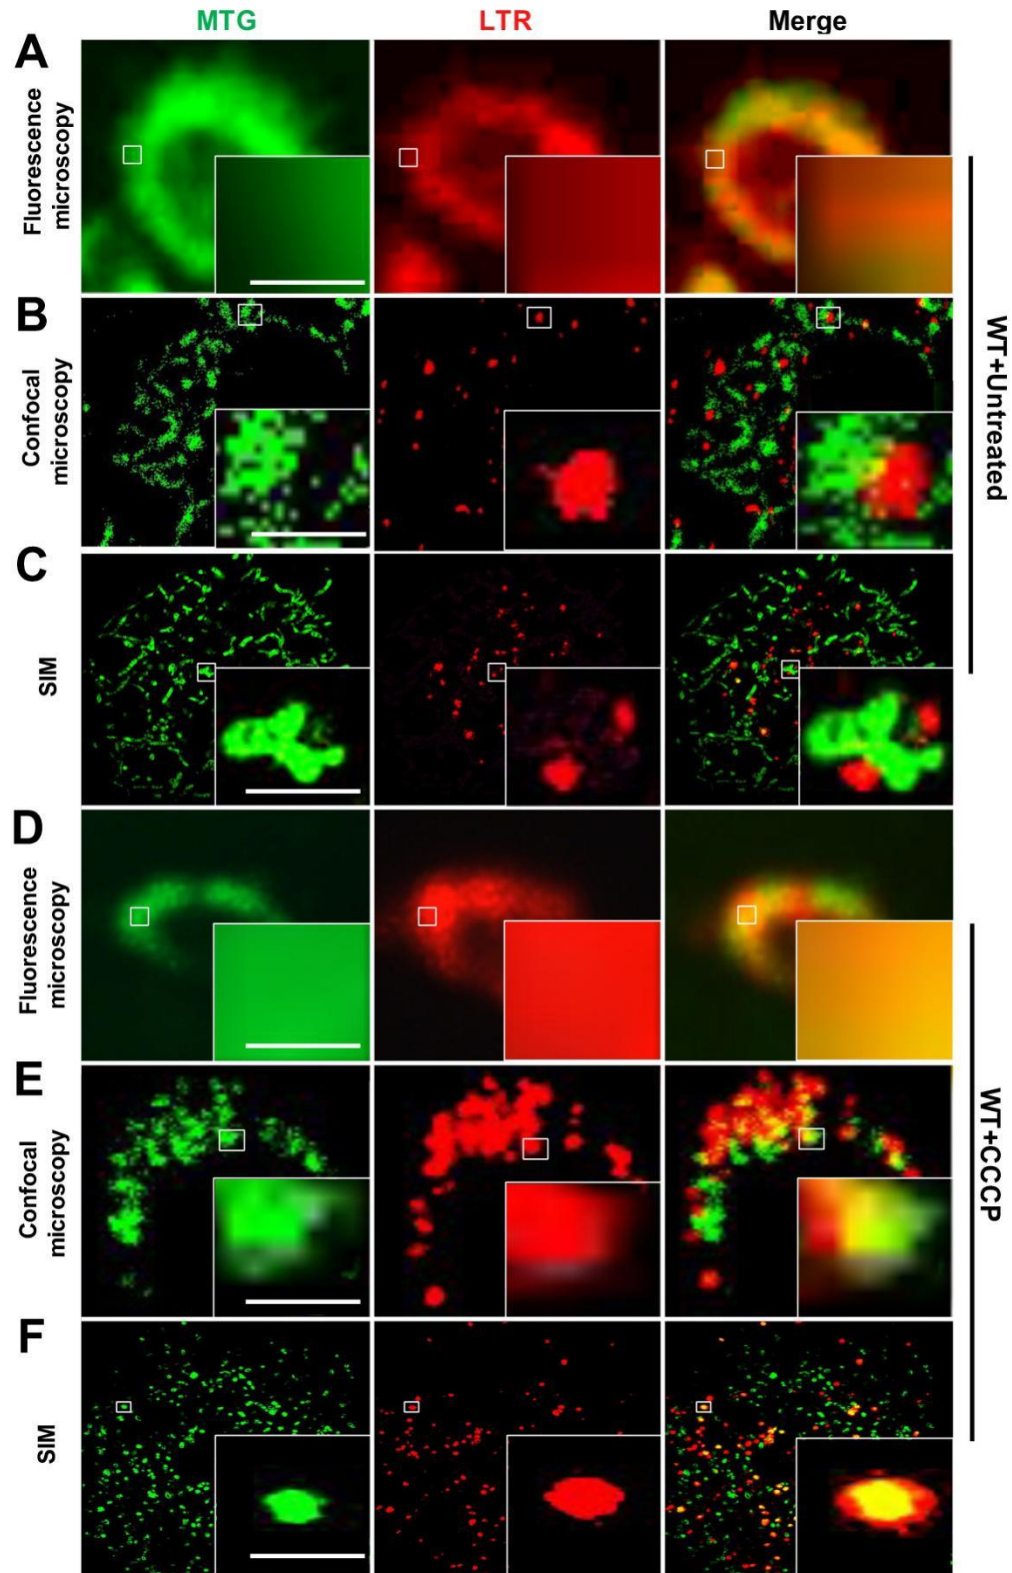

410

411

412 **Fig. 5**

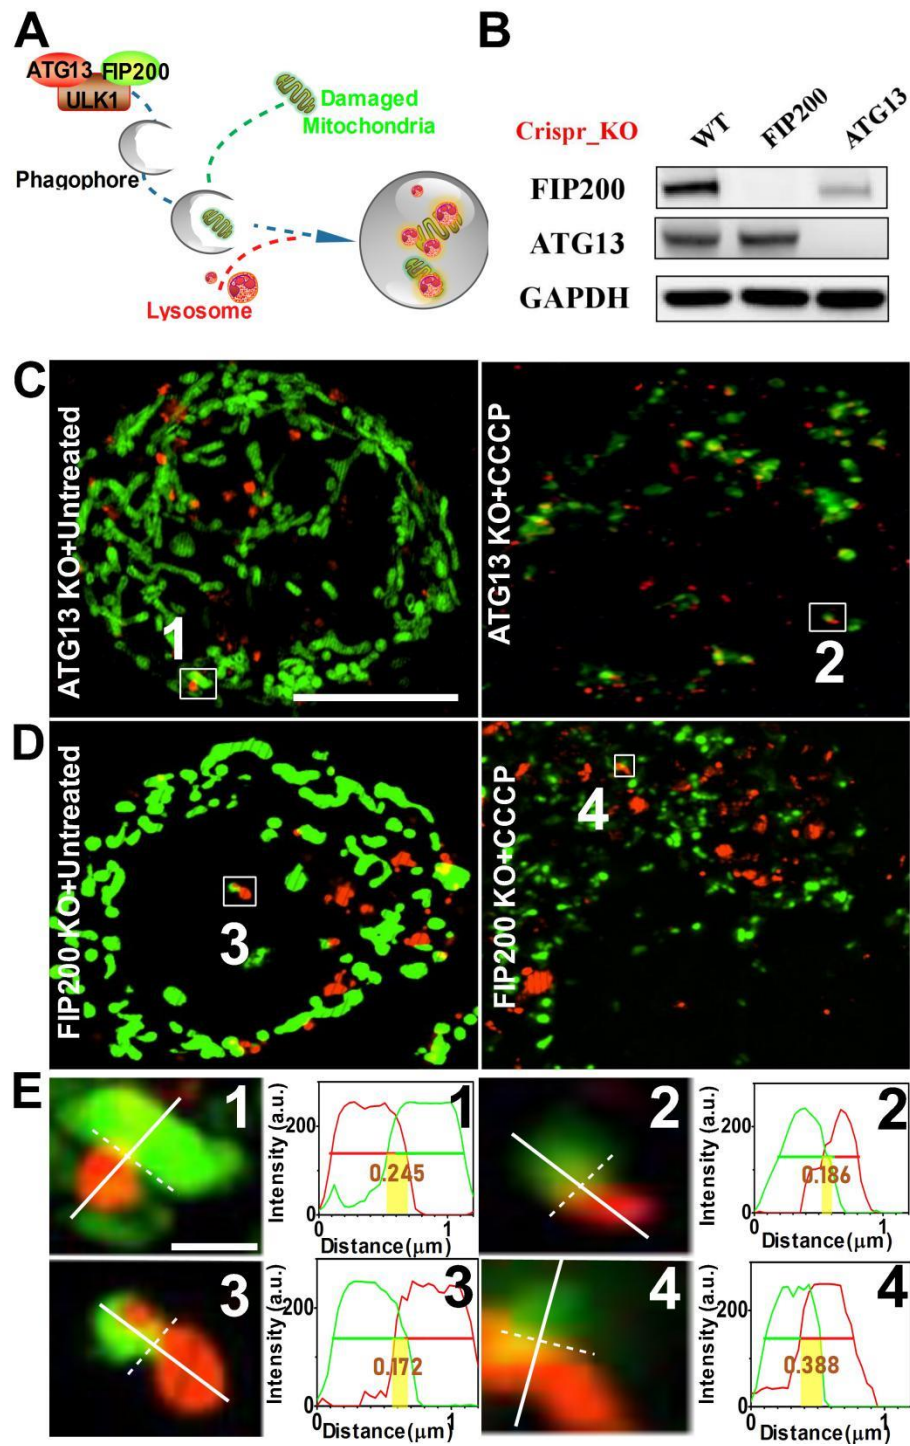

413

414
